# Supplementary material for: l-Glutamate drives porcine intestinal epithelial renewal by increasing stem cell activity via upregulation of the EGFR-ERK-mTORC1 pathway
Source: Royal Society of Chemistry journal article supplement (doi:10.1039/c9fo03065d), 2020-01-01
Supplement: c9fo03065d1.pdf [file c9fo03065d1.pdf]

## Supplemental Figure

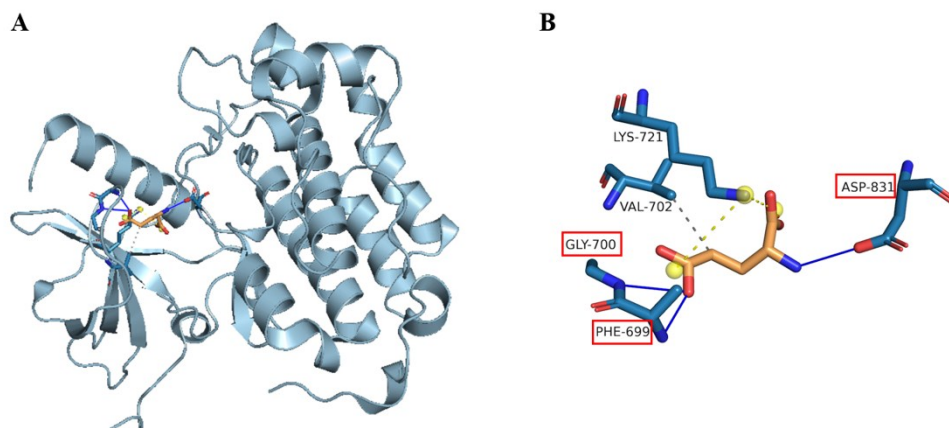

**Fig. S1 Binding patterns (A) and binding sites (B) of Glu and EGFR.** The docking results reveals that there were 3 hydrophobic interactions, 3 hydrogen bonds (Phe699, Gly700, and Asp831 amino acid residues), and 2 salt bridges between Glu and the EGFR.

**Supplemental Table****Table S1:** Primers used for quantitative real-time PCR

| <b>genes</b>                    | <b>primers</b> | <b>sequence (5'-3')</b>        | <b>product size (bp)</b> |
|---------------------------------|----------------|--------------------------------|--------------------------|
| <i>PCNA</i>                     | sense          | TACGCTAAGGGCAGAAGATAATG        | 192 bp                   |
|                                 | antisense      | CTGAGATCTCGGCATATACGTG         |                          |
| <i>KRT20</i>                    | sense          | GTGGGTTGGCAATGAGAAGA           | 149 bp                   |
|                                 | antisense      | TTCCTAACACCCATGAAACTG          |                          |
| <i>Lgr5</i>                     | sense          | GACTGATGCCAGGCGTGTTG           | 131 bp                   |
|                                 | antisense      | CATGGGACAAATGCCACGGAAG         |                          |
| <i>Mucin2</i>                   | sense          | ACGGACCGCAGGGACAACG            | 272 bp                   |
|                                 | antisense      | GTGATGCTGGAGACGGAGGAGATG       |                          |
| <i>ChgA</i>                     | sense          | GAGGTCCCATCAGCAGAAGAAACAG<br>A | 291 bp                   |
|                                 | antisense      | TTCTTGCTGGGAAGGCTGGCTAA        |                          |
| <i>Villin</i>                   | sense          | CTATCCACAAGACGGGCAGCAAC        | 205 bp                   |
|                                 | antisense      | CGGATGACGATGCCCTGTTTG          |                          |
| <i>LYZ</i>                      | sense          | CCCGGCTTCTCAGACAACAT           | 135 bp                   |
|                                 | antisense      | CCTATAGCCGTCCATGCCAG           |                          |
| <i><math>\beta</math>-actin</i> | sense          | TGCGGGACATCAAGGAGAAG           | 216 bp                   |
|                                 | antisense      | AGTTGAAGGTGGTCTCGTGG           |                          |
